# Supplementary material for: Wild and farmed salmon (Salmo salar) as reservoirs for infectious salmon anaemia virus, and the importance of horizontal- and vertical transmission
Source: PubMed Central journal article supplement (PMC6467415; doi:10.1371/journal.pone.0215478), 2019-04-16
Supplement: pone.0215478.s001.pdf [file pone.0215478.s001.pdf]

## S1 Table.

Deleted: Appendix

| Norway    |      |      |            |           |    |                                |
|-----------|------|------|------------|-----------|----|--------------------------------|
| Rogaland  |      |      |            |           |    |                                |
| Clade     | HPR  | Year | Code       | Accession |    | Host                           |
| CIVe      | HPRΔ | 2005 | R111/05    | DQ108609  | SW | Farmed, <i>Salmo salar</i>     |
| CIVe      | HPRΔ | 2005 | R2005/09B  | FM203273  | SW | Farmed, <i>Salmo salar</i>     |
| CIVe      | HPRΔ | 2005 | R2005/08A  | FM203276  | SW | Farmed, <i>Salmo salar</i>     |
| CIV       | HPRΔ | 2009 | R170/09    | MH286495  | FW | Wild, <i>Salmo trutta</i>      |
| CIVb      | HPR0 | 2010 | R229/14    | MH397913  | SW | Farmed, <i>Salmo salar</i>     |
| CIVb      | HPRΔ | 2017 | R230/17    | MH397914  | SW | Farmed, <i>Salmo salar</i>     |
| CIVb      | HPRΔ | 2017 | R231/17    | MH397915  | SW | Farmed, <i>Salmo salar</i>     |
| Hordaland |      |      |            |           |    |                                |
| HPR       | Year | Code | Accession  |           |    | Host                           |
| CIV       | HPRΔ | 1987 | H1/87      | AF364893  | SW | Farmed, <i>Salmo salar</i>     |
| CII       | HPRΔ | 1989 | H2/89      | AF220607  | SW | Farmed, <i>Salmo salar</i>     |
| CII       | HPRΔ | 1990 | H-ISAV4/90 | DQ785248  | SW | Farmed, <i>Salmo salar</i>     |
| CII       | HPRΔ | 1991 | H6/91      | AF364894  | SW | Farmed, <i>Salmo salar</i>     |
| CIV       | HPRΔ | 1992 | H7/92      | AF364898  | SW | Farmed, <i>Salmo salar</i>     |
| CIV       | HPRΔ | 1993 | H8/93      | AF309075  | SW | Farmed, <i>Salmo salar</i>     |
| CIVe      | HPRΔ | 1996 | H17/96     | AF364891  | SW | Farmed, <i>Salmo salar</i>     |
| CIVe      | HPRΔ | 1996 | H-ISAV5/96 | DQ785249  | SW | Farmed, <i>Salmo salar</i>     |
| CIV       | HPRΔ | 1998 | H36/98     | AF302799  | SW | Farmed, <i>Salmo salar</i>     |
| CII       | HPRΔ | 1998 | H40/98     | AF364877  | SW | Farmed, <i>Salmo salar</i>     |
| CIV       | HPRΔ | 1998 | H45/99     | AF364870  | SW | Farmed, <i>Salmo salar</i>     |
| CIVe      | HPRΔ | 2000 | H51/00     | AF364882  | SW | Farmed, <i>Salmo salar</i>     |
| CIVe      | HPRΔ | 2000 | H56/00     | AF364880  | SW | Farmed, <i>Salmo salar</i>     |
| CIVe      | HPRΔ | 2004 | H88/04     | AY973178  | FW | Farmed, <i>Salmo salar</i>     |
| CIIIb     | HPRΔ | 2004 | H93/04     | AY97379   | SW | Farmed, <i>Salmo salar</i>     |
| CIVe      | HPRΔ | 2004 | H96/04     | AY973180  | FW | Brood fish, <i>Salmo salar</i> |
| CIV       | HPR0 | 2004 | H97/04     | DQ108604  | FW | Brood fish, <i>Salmo salar</i> |
| CIV       | HPR0 | 2004 | H97b/04    | MH397901  | FW | Brood fish, <i>Salmo salar</i> |
| CIV       | HPR0 | 2004 | H97c/04    | MH397902  | FW | Brood fish, <i>Salmo salar</i> |
| CIV       | HPR0 | 2004 | H97d/04    | MH397903  | FW | Brood fish, <i>Salmo salar</i> |
| CIV       | HPR0 | 2004 | H97e/04    | MH397904  | FW | Brood fish, <i>Salmo salar</i> |
| CVI       | HPRΔ | 2004 | H97f/04    | MH397905  | FW | Brood fish, <i>Salmo salar</i> |
| CIVe      | HPRΔ | 2004 | H99/04     | AY973181  | SW | Farmed, <i>Salmo salar</i>     |
| CIVe      | HPRΔ | 2004 | H101/04    | DQ108602  | SW | Farmed, <i>Salmo salar</i>     |
| CIIb      | HPRΔ | 2004 | H112A/04   | DQ108603  | FW | Farmed, <i>Salmo salar</i>     |
| CIIIb     | HPRΔ | 2004 | H2004/07A  | FM203255  | SW | Farmed, <i>Salmo salar</i>     |
| CIIIb     | HPRΔ | 2004 | H2004/07B  | FM203256  | SW | Farmed, <i>Salmo salar</i>     |
| CIVe      | HPRΔ | 2004 | H2004/12A  | FM203264  | SW | Farmed, <i>Salmo salar</i>     |
| CIVe      | HPRΔ | 2004 | H2004/12B  | FM203265  | SW | Farmed, <i>Salmo salar</i>     |
| CIVe      | HPRΔ | 2004 | H2004/13A  | FM203266  | SW | Farmed, <i>Salmo salar</i>     |
| CIVe      | HPRΔ | 2004 | H2004/13B  | FM203267  | SW | Farmed, <i>Salmo salar</i>     |
| CIIIb     | HPRΔ | 2005 | H2005/07A  | FM203284  | SW | Farmed, <i>Salmo salar</i>     |
| CIIIb     | HPRΔ | 2005 | H2005/07B  | FM203285  | SW | Farmed, <i>Salmo salar</i>     |
| CIVe      | HPRΔ | 2006 | H-2006/02A | FR751548  | SW | Farmed, <i>Salmo salar</i>     |
| CIVe      | HPRΔ | 2006 | H-2006/02B | FR751549  | SW | Farmed, <i>Salmo salar</i>     |

|                         |            |             |              |                  |    |                                |
|-------------------------|------------|-------------|--------------|------------------|----|--------------------------------|
| CIVb                    | HPR0       | 2008        | H138/08      | JN711063         | FW | Farmed, <i>Salmo salar</i>     |
| CIV                     | HPR0       | 2010        | H172/10      | JN711064         | FW | Farmed, <i>Salmo salar</i>     |
| CIVb                    | HPR0       | 2013        | H238/13      | MH397899         | SW | Farmed, <i>Salmo salar</i>     |
| CIVb                    | HPRΔ       | 2015        | H195/15      | MH397898         | SW | Brood fish, <i>Salmo salar</i> |
| CIV                     | HPRΔ       | 2018        | H245/18      | MH397900         | SW | Farmed, <i>Salmo salar</i>     |
| CIVb                    | HPRΔ       | 2018        | H248/18      | MH986019         | SW | Farmed, <i>Salmo salar</i>     |
| <b>Sogn og Fjordane</b> | <b>HPR</b> | <b>Year</b> | <b>Code</b>  | <b>Accession</b> |    | <b>Host</b>                    |
| CII                     | HPRΔ       | 1995        | SF14/95      | AF364873         | SW | Farmed, <i>Salmo salar</i>     |
| CII                     | HPRΔ       | 1995        | SF-ISAV10/95 | DQ785254         | SW | Farmed, <i>Salmo salar</i>     |
| CIV                     | HPRΔ       | 1996        | SF18/96      | AF364869         | SW | Farmed, <i>Salmo salar</i>     |
| CIV                     | HPRΔ       | 1998        | SF41/98      | AF364871         | SW | Farmed, <i>Salmo salar</i>     |
| CIV                     | HPRΔ       | 1999        | SF48/99      | AF364878         | SW | Farmed, <i>Salmo salar</i>     |
| CIV                     | HPRΔ       | 1999        | SF47/99      | AF364888         | SW | Farmed, <i>Salmo salar</i>     |
| CIIb                    | HPRΔ       | 2000        | SF54/00      | AF364884         | SW | Farmed, <i>Salmo salar</i>     |
| CIIb                    | HPRΔ       | 2000        | SF57/00      | AF364890         | SW | Farmed, <i>Salmo salar</i>     |
| CIIb                    | HPRΔ       | 2001        | SF63/01      | AY127879         | SW | Farmed, <i>Salmo salar</i>     |
| CIIb                    | HPRΔ       | 2002        | SF70/02      | AY127880         | SW | Farmed, <i>Salmo salar</i>     |
| CIIb                    | HPRΔ       | 2002        | SF71/02      | AY127881         | SW | Farmed, <i>Salmo salar</i>     |
| CIV                     | HPR0       | 2004        | SF83/04      | AY973190         | FW | Farmed, <i>Salmo salar</i>     |
| CII                     | HPRΔ       | 2004        | SF94/04      | DQ108611         | SW | Farmed, <i>Salmo salar</i>     |
| CII                     | HPRΔ       | 2004        | SF2004/11A   | FM203262         | SW | Farmed, <i>Salmo salar</i>     |
| CII                     | HPRΔ       | 2004        | SF2004/11B   | FM203263         | SW | Farmed, <i>Salmo salar</i>     |
| CIV                     | HPR0       | 2005        | SF109/05     | DQ108610         | SW | Farmed, <i>Salmo salar</i>     |
| CIVb                    | HPR0       | 2011        | SF175/11     | MH397918         | SW | Farmed, <i>Salmo salar</i>     |
| CII                     | HPRΔ       | 2013        | SF183/13     | MH397919         | SW | Farmed, <i>Salmo salar</i>     |
| CIVb                    | HPR0       | 2014        | SF233/14     | MH397922         | SW | Farmed, <i>Salmo salar</i>     |
| CIV                     | HPR0       | 2015        | SF210a/15    | MH397920         | SW | Farmed, <i>Salmo salar</i>     |
| CIVb                    | HPR0       | 2015        | SF210b/15    | MH397921         | SW | Farmed, <i>Salmo salar</i>     |
| CIVb                    | HPR0       | 2018        | SF246a/18    | MH986020         | SW | Farmed, <i>Salmo salar</i>     |
| CIVb                    | HPR0       | 2018        | SF246b/18    | MH986021         | SW | Farmed, <i>Salmo salar</i>     |
| CIIIa, NI in fig.       | HPRΔ       | 2018        | SF247/18     | MH986022         | SW | Farmed, <i>Salmo salar</i>     |
| <b>Møre og Romsdal</b>  | <b>HPR</b> | <b>Year</b> | <b>Code</b>  | <b>Accession</b> |    | <b>Host</b>                    |
| CIV                     | HPRΔ       | 1999        | MR46/99      | AF364896         | SW | Farmed, <i>Salmo salar</i>     |
| CIIIb                   | HPRΔ       | 2000        | MR52/00      | AF364892         | SW | Farmed, <i>Salmo salar</i>     |
| CIV                     | HPRΔ       | 2001        | MR60/01      | AY127876         | SW | Farmed, <i>Salmo salar</i>     |
| CIIb                    | HPRΔ       | 2001        | MR61/01      | AY127877         | SW | Farmed, <i>Salmo salar</i>     |
| CIIb                    | HPRΔ       | 2001        | MR62/01      | AY127878         | SW | Farmed, <i>Salmo salar</i>     |
| CIIIb                   | HPR0       | 2005        | MR102/05     | DQ108605         | FW | Brood fish location            |
| CIIIc                   | HPR0       | 2005        | MR102b/05    | MH397906         | FW | Brood fish location            |
| CIIIb                   | HPR0       | 2005        | MR102c/05    | MH397907         | FW | Brood fish location            |
| CIIIc                   | HPR0       | 2005        | MR102d/05    | MH397908         | FW | Brood fish location            |
| CIIIc                   | HPR0       | 2005        | MR102e/05    | MH397909         | FW | Brood fish location            |
| CIIIb                   | HPRΔ       | 2005        | MR103/05     | DQ108606         | SW | Brood fish, <i>Salmo salar</i> |
| CIV                     | HPR0       | 2005        | MR104/05     | DQ108607         | FW | Brood fish location            |
| CIIIb                   | HPRΔ       | 2005        | MR105/05     | DQ108608         | SW | Brood fish, <i>Salmo salar</i> |
| CIVe                    | HPRΔ       | 2006        | MR118/06     | MH397910         | SW | Farmed, <i>Salmo salar</i>     |
| CII                     | HPRΔ       | 2008        | MR139/08     | JN711065         | SW | Farmed, <i>Salmo salar</i>     |
| CII                     | HPRΔ       | 2008        | MR-AR13/08-1 | FN687354         | SW | Farmed, <i>Salmo salar</i>     |
| CII                     | HPRΔ       | 2008        | MR-AR13/08-2 | FN687355         | SW | Farmed, <i>Salmo salar</i>     |

|                       |            |             |              |                  |    |                                |
|-----------------------|------------|-------------|--------------|------------------|----|--------------------------------|
| CIIIa                 | HPRΔ       | 2008        | MR-ISA3/08-1 | FN687308         | SW | Farmed, <i>Salmo salar</i>     |
| CIIIa                 | HPRΔ       | 2008        | MR-ISA3/08-2 | FN687309         | SW | Farmed, <i>Salmo salar</i>     |
| CII                   | HPRΔ       | 2008        | MR-ISA4/08-1 | FN687310         | SW | Farmed, <i>Salmo salar</i>     |
| CII                   | HPRΔ       | 2008        | MR-ISA4/08-2 | FN687311         | SW | Farmed, <i>Salmo salar</i>     |
| CIIIa                 | HPRΔ       | 2012        | MR177/12     | MH397911         | SW | Brood fish, <i>Salmo salar</i> |
| <b>Sør Trøndelag</b>  | <b>HPR</b> | <b>Year</b> | <b>Code</b>  | <b>Accession</b> |    | <b>Host</b>                    |
| CIIIb                 | HPRΔ       | 1996        | ST21/96      | AF364886         | SW | Farmed, <i>Salmo salar</i>     |
| CIIIb                 | HPRΔ       | 1996        | ST-ISAV1/96  | DQ785245         | SW | Farmed, <i>Salmo salar</i>     |
| CIIIb                 | HPRΔ       | 1997        | ST26/97      | AF364879         | SW | Farmed, <i>Salmo salar</i>     |
| CIVc                  | HPRΔ       | 1997        | ST25/97      | AF364885         | SW | Farmed, <i>Salmo salar</i>     |
| CIVc                  | HPRΔ       | 1997        | ST27/97      | AF364897         | SW | Farmed, <i>Salmo salar</i>     |
| CIVc                  | HPRΔ       | 1997        | ST28/97      | AF364875         | SW | Farmed, <i>Salmo salar</i>     |
| CIIIb                 | HPRΔ       | 1997        | ST30/97      | AY127875         | SW | Farmed, <i>Salmo salar</i>     |
| CIVc                  | HPRΔ       | 1997        | ST-ISAV8/97  | DQ785252         | SW | Farmed, <i>Salmo salar</i>     |
| CIIIb                 | HPRΔ       | 1999        | ST44/99      | AF302803         | SW | Farmed, <i>Salmo salar</i>     |
| CIIIb                 | HPRΔ       | 2003        | ST77/03      | AY973191         | SW | Farmed, <i>Salmo salar</i>     |
| CIVc                  | HPRΔ       | 2004        | ST82/04      | AY973192         | SW | Farmed, <i>Salmo salar</i>     |
| CIVc                  | HPRΔ       | 2004        | ST2004/02A   | FM203247         | SW | Farmed, <i>Salmo salar</i>     |
| CIVc                  | HPRΔ       | 2004        | ST2004/02B   | FM203248         | SW | Farmed, <i>Salmo salar</i>     |
| CIV                   | HPRΔ       | 2005        | ST110/05     | DQ108598         | SW | Farmed, <i>Salmo salar</i>     |
| CIV                   | HPRΔ       | 2005        | ST2005/06A   | FM203282         | SW | Farmed, <i>Salmo salar</i>     |
| CIV                   | HPRΔ       | 2005        | ST2005/06B   | FM203283         | SW | Farmed, <i>Salmo salar</i>     |
| CIIIa                 | HPRΔ       | 2008        | ST143/08     | JN711073         | SW | Farmed, <i>Salmo salar</i>     |
| CII                   | HPRΔ       | 2008        | ST-ISA1/08   | FN687305         | SW | Farmed, <i>Salmo salar</i>     |
| CI                    | HPR0       | 2013        | ST236/13     | MH286494         | FW | Wild, <i>Salmo salar</i>       |
| CI                    | HPR0       | 2014        | ST235/14     | MH286493         | FW | Wild, <i>Salmo salar</i>       |
| CII                   | HPR0       | 2015        | ST203/15     | MH286490         | SW | Wild, <i>Salmo salar</i>       |
| CII                   | HPR0       | 2015        | ST234/15     | MH286492         | FW | Wild, <i>Salmo salar</i>       |
| CII                   | HPR0       | 2016        | ST207/16     | MH286491         | SW | Wild, <i>Salmo salar</i>       |
| <b>Nord Trøndelag</b> | <b>HPR</b> | <b>Year</b> | <b>Code</b>  | <b>Accession</b> |    | <b>Host</b>                    |
| CII                   | HPRΔ       | 1998        | NT38/99      | AF364874         | SW | Farmed, <i>Salmo salar</i>     |
| CIIIb                 | HPRΔ       | 2003        | NT78/03      | AY973183         | SW | Farmed, <i>Salmo salar</i>     |
| CIIIb                 | HPRΔ       | 2003        | NT81/03      | AY973184         | SW | Farmed, <i>Salmo salar</i>     |
| CIIIb                 | HPRΔ       | 2003        | NT2003/04A   | FM203243         | SW | Farmed, <i>Salmo salar</i>     |
| CIIIb, NI in Figs     | HPRΔ       | 2003        | NT2003/06A   | FM203245         | SW | Farmed, <i>Salmo salar</i>     |
| CIIIb, NI in Figs     | HPRΔ       | 2003        | NT2003/06B   | FM203246         | SW | Farmed, <i>Salmo salar</i>     |
| CIIIb                 | HPRΔ       | 2004        | NT2004/10A   | FM203260         | SW | Farmed, <i>Salmo salar</i>     |
| CIIIb                 | HPRΔ       | 2004        | NT2004/10B   | FM203261         | SW | Farmed, <i>Salmo salar</i>     |
| CIIIb, NI in Figs     | HPRΔ       | 2004        | NT2004/03A   | FM203290         | SW | Farmed, <i>Salmo salar</i>     |
| CIIIb, NI in Figs     | HPRΔ       | 2004        | NT2004/03B   | FM203291         | SW | Farmed, <i>Salmo salar</i>     |
| CIIIb, NI in Figs     | HPRΔ       | 2004        | NT2004/08A   | FM203257         | SW | Farmed, <i>Salmo salar</i>     |
| CIIIb, NI in Figs     | HPRΔ       | 2004        | NT2004/08B   | FM203258         | SW | Farmed, <i>Salmo salar</i>     |
| CIVc                  | HPRΔ       | 2004        | NT84/04      | AY973185         | SW | Farmed, <i>Salmo salar</i>     |
| CIIIb                 | HPRΔ       | 2004        | NT87/04      | AY973186         | SW | Farmed, <i>Salmo salar</i>     |
| CIIIb                 | HPRΔ       | 2004        | NT92B/04     | AY973188         | SW | Farmed, <i>Salmo salar</i>     |
| CIIIb                 | HPRΔ       | 2004        | NT95/04      | AY973189         | SW | Farmed, <i>Salmo salar</i>     |
| CII                   | HPRΔ       | 2005        | NT115/05     | JN711068         | SW | Farmed, <i>Salmo salar</i>     |
| CII                   | HPRΔ       | 2005        | NT2005/11B   | FM203297         | SW | Farmed, <i>Salmo salar</i>     |
| CIIIa                 | HPRΔ       | 2008        | NT134/08     | JN711069         | SW | Farmed, <i>Salmo salar</i>     |

|                  |            |             |              |                  |    |                                |
|------------------|------------|-------------|--------------|------------------|----|--------------------------------|
| CIIa             | HPRΔ       | 2008        | NT141/08     | JN711070         | SW | Farmed, <i>Salmo salar</i>     |
| CIIa             | HPR0       | 2008        | NT-AR26/08-1 | FN687356         | SW | Farmed, <i>Salmo salar</i>     |
| CIIa             | HPR0       | 2008        | NT-AR26/08-2 | FN687357         | SW | Farmed, <i>Salmo salar</i>     |
| CIIa             | HPRΔ       | 2008        | NT-ISA5/08-1 | FN687312         | SW | Farmed, <i>Salmo salar</i>     |
| CIIa             | HPRΔ       | 2008        | NT-ISA5/08-2 | FN687313         | SW | Farmed, <i>Salmo salar</i>     |
| CIIa, NI in Figs | HPRΔ       | 2008        | NT-ISA7/08-1 | FN687316         | SW | Farmed, <i>Salmo salar</i>     |
| CIIa             | HPRΔ       | 2008        | NT-SA7/08-2  | FN687317         | SW | Farmed, <i>Salmo salar</i>     |
| CIIa             | HPRΔ       | 2008        | NT-ISA8/08   | FN687318         | SW | Farmed, <i>Salmo salar</i>     |
| CIIa             | HPRΔ       | 2008        | NT-ISA9/08-1 | FN687319         | SW | Farmed, <i>Salmo salar</i>     |
| CIIa             | HPRΔ       | 2008        | NT-ISA9/08-2 | FN687320         | SW | Farmed, <i>Salmo salar</i>     |
| CIIa             | HPRΔ       | 2009        | NT155/09     | JN711071         | SW | Farmed, <i>Salmo salar</i>     |
| CIIa             | HPRΔ       | 2009        | NT156/09     | JN711072         | SW | Farmed, <i>Salmo salar</i>     |
| CIIa             | HPRΔ       | 2009        | NT-ISA4/09-1 | FN687340         | SW | Farmed, <i>Salmo salar</i>     |
| CIIa             | HPRΔ       | 2009        | NT-ISA4/09-2 | FN687341         | SW | Farmed, <i>Salmo salar</i>     |
| CII              | HPR0       | 2015        | NT197/15     | MH286482         | SW | Wild, <i>Salmo salar</i>       |
| CII              | HPR0       | 2015        | NT198/15     | MH286483         | SW | Wild, <i>Salmo salar</i>       |
| CII              | HPR0       | 2015        | NT199/15     | MH286484         | SW | Wild, <i>Salmo salar</i>       |
| CI               | HPR0       | 2015        | NT204a/15    | MH286485         | SW | Wild, <i>Salmo salar</i>       |
| CI               | HPR0       | 2015        | NT204b/15    | MH286486         | SW | Wild, <i>Salmo salar</i>       |
| CII              | HPR0       | 2015        | NT205/15     | MH286487         | SW | Wild, <i>Salmo salar</i>       |
| CII              | HPR0       | 2015        | NT206/15     | MH286488         | SW | Wild, <i>Salmo salar</i>       |
| CIId             | HPR0       | 2016        | NT242/16     | MH286489         | SW | Wild, <i>Salmo salar</i>       |
| CII, NI in Figs  | HPR0       | 2018        | NT250/18     | MK125504         | SW | Wild, <i>Salmo salar</i>       |
| <b>Nordland</b>  | <b>HPR</b> | <b>Year</b> | <b>Code</b>  | <b>Accession</b> |    | <b>Host</b>                    |
| CIV              | HPRΔ       | 1989        | N5/89        | AY127882         | SW | Farmed, <i>Salmo salar</i>     |
| CIV              | HPRΔ       | 1989        | N-ISA V3/89  | DQ785247         | SW | Farmed, <i>Salmo salar</i>     |
| CIV              | HPRΔ       | 1993        | N9/93        | AF364895         | SW | Farmed, <i>Salmo salar</i>     |
| CIV              | HPRΔ       | 1993        | N-ISA V9/93  | DQ785253         | SW | Farmed, <i>Salmo salar</i>     |
| CIV              | HPRΔ       | 1996        | N-Vir22/96   | DQ785258         | SW | Farmed, <i>Salmo salar</i>     |
| CIV              | HPRΔ       | 1997        | N-Vir25/97   | DQ785256         | SW | Farmed, <i>Salmo salar</i>     |
| CIV              | HPRΔ       | 1997        | N29/97       | AF364872         | SW | Farmed, <i>Salmo salar</i>     |
| CIV              | HPRΔ       | 1998        | N32/98       | AF364883         | SW | Farmed, <i>Salmo salar</i>     |
| CIIIb            | HPRΔ       | 1999        | N49/99       | AF364876         | SW | Farmed, <i>Salmo salar</i>     |
| CIIa             | HPRΔ       | 2003        | N75/03       | AY971661         | SW | Farmed, <i>Salmo salar</i>     |
| CIVe             | HPRΔ       | 2004        | N89/04       | AY971662         | SW | Farmed, <i>Salmo salar</i>     |
| CIVe             | HPRΔ       | 2004        | N2004/05A    | FM203251         | SW | Farmed, <i>Salmo salar</i>     |
| CIV              | HPRΔ       | 2007        | N127a/07     | JN711066         | SW | Farmed, <i>Salmo salar</i>     |
| CIV              | HPRΔ       | 2007        | N127b/07     | JN711067         | SW | Farmed, <i>Salmo salar</i>     |
| CIVe             | HPRΔ       | 2007        | N-ISA1/07-1  | FN687284         | SW | Farmed, <i>Salmo salar</i>     |
| CIIa             | HPRΔ       | 2013        | N179/13      | MH397923         | SW | Brood fish, <i>Salmo salar</i> |
| CIV              | HPRΔ       | 2013        | N180a/13     | MH397924         | SW | Farmed, <i>Salmo salar</i>     |
| CIV              | HPRΔ       | 2013        | N180b/13     | MH397925         | SW | Farmed, <i>Salmo salar</i>     |
| CIV              | HPRΔ       | 2013        | N180c/13     | MH397926         | SW | Farmed, <i>Salmo salar</i>     |
| CIV              | HPRΔ       | 2013        | N182/13      | MH397927         | SW | Farmed, <i>Salmo salar</i>     |
| CIV              | HPRΔ       | 2014        | N184/14      | MH397928         | SW | Farmed, <i>Salmo salar</i>     |
| CIV              | HPRΔ       | 2014        | N185A/14     | MH397929         | SW | Farmed, <i>Salmo salar</i>     |
| CIIa             | HPR0       | 2014        | N185B/14     | MH397930         | SW | Farmed, <i>Salmo salar</i>     |
| CIIa             | HPRΔ       | 2014        | N187a/14     | MH397931         | SW | Farmed, <i>Salmo salar</i>     |
| CIIa             | HPRΔ       | 2014        | N187b/14     | MH397932         | SW | Farmed, <i>Salmo salar</i>     |

|                   |             |             |             |                  |    |                            |
|-------------------|-------------|-------------|-------------|------------------|----|----------------------------|
| CIIa              | HPRΔ        | 2014        | N187c/14    | MH397933         | SW | Farmed, <i>Salmo salar</i> |
| CIIa              | HPRΔ        | 2014        | N187d/14    | MH397934         | SW | Farmed, <i>Salmo salar</i> |
| CIIa              | HPRΔ        | 2014        | N188/14     | MH397935         | SW | Farmed, <i>Salmo salar</i> |
| CIIa              | HPRΔ        | 2014        | N189/14     | MH397936         | SW | Farmed, <i>Salmo salar</i> |
| CIV               | HPRΔ        | 2014        | N190/14     | MH397937         | SW | Farmed, <i>Salmo salar</i> |
| CIV               | HPRΔ        | 2014        | N193/14     | MH397938         | SW | Farmed, <i>Salmo salar</i> |
| CIV               | HPRΔ        | 2015        | N194/15     | MH397939         | SW | Farmed, <i>Salmo salar</i> |
| CIV               | HPRΔ        | 2015        | N196/15     | MH397940         | SW | Farmed, <i>Salmo salar</i> |
| CIIa              | HPRΔ        | 2017        | N239/17     | MH397941         | SW | Farmed, <i>Salmo salar</i> |
| <b>Troms</b>      | <b>HPRΔ</b> | <b>Year</b> | <b>Code</b> | <b>Accession</b> |    | <b>Host</b>                |
| CIIa              | HPRΔ        | 1993        | T10/93      | AF302801         | SW | Farmed, <i>Salmo salar</i> |
| CIIa              | HPRΔ        | 1993        | T-ISAV11/93 | DQ785255         | SW | Farmed, <i>Salmo salar</i> |
| CIVd              | HPRΔ        | 1996        | T-ISAV7/96  | DQ785251         | SW | Farmed, <i>Salmo salar</i> |
| CIVd              | HPRΔ        | 1996        | T22/96      | AF364889         | SW | Farmed, <i>Salmo salar</i> |
| CIVd              | HPRΔ        | 1998        | T33/98      | AF364887         | SW | Farmed, <i>Salmo salar</i> |
| CII               | HPRΔ        | 1998        | T37/98      | AF364881         | SW | Farmed, <i>Salmo salar</i> |
| CIIa              | HPRΔ        | 2002        | T73/02      | AY971663         | SW | Farmed, <i>Salmo salar</i> |
| CIIa              | HPRΔ        | 2003        | T74/03      | AY971664         | SW | Farmed, <i>Salmo salar</i> |
| CIVe              | HPRΔ        | 2003        | T79/03      | AY971665         | SW | Farmed, <i>Salmo salar</i> |
| CIIIb             | HPRΔ        | 2003        | T2003/03A   | FM203240         | SW | Farmed, <i>Salmo salar</i> |
| CIIIb, NI in Fig. | HPRΔ        | 2003        | T2003/03B   | FM203241         | SW | Farmed, <i>Salmo salar</i> |
| CIIIb, NI in Fig. | HPRΔ        | 2003        | T2003/03C   | FM203242         | SW | Farmed, <i>Salmo salar</i> |
| CIIIb, NI in Fig. | HPRΔ        | 2003        | T2003/06A   | FM203245         | SW | Farmed, <i>Salmo salar</i> |
| CIIIb, NI in Fig. | HPRΔ        | 2003        | T2003/06B   | FM203246         | SW | Farmed, <i>Salmo salar</i> |
| CIIIb, NI in Fig. | HPRΔ        | 2004        | T2004/08A   | FM203257         | SW | Farmed, <i>Salmo salar</i> |
| CIIIb, NI in Fig. | HPRΔ        | 2004        | T2004/08A   | FM203258         | SW | Farmed, <i>Salmo salar</i> |
| CII               | HPRΔ        | 2004        | T85/04      | AY971693         | SW | Farmed, <i>Salmo salar</i> |
| CIVc              | HPRΔ        | 2004        | T90/04      | AY971666         | SW | Farmed, <i>Salmo salar</i> |
| CIIa              | HPRΔ        | 2004        | T91/04      | AY971667         | SW | Farmed, <i>Salmo salar</i> |
| CIVc              | HPRΔ        | 2004        | T2004/06A   | FM203253         | SW | Farmed, <i>Salmo salar</i> |
| CIVc              | HPRΔ        | 2004        | T2004/06B   | FM203254         | SW | Farmed, <i>Salmo salar</i> |
| CIIa              | HPRΔ        | 2004        | T2004/09B   | FM203259         | SW | Farmed, <i>Salmo salar</i> |
| CIIa              | HPRΔ        | 2007        | T121/07     | JN711074         | SW | Farmed, <i>Salmo salar</i> |
| CIIIb             | HPRΔ        | 2007        | T122/07     | JN711075         | SW | Farmed, <i>Salmo salar</i> |
| CIIIb             | HPRΔ        | 2007        | T124/07     | JN711076         | SW | Farmed, <i>Salmo salar</i> |
| CIIa              | HPRΔ        | 2007        | T126/07     | JN711076         | SW | Farmed, <i>Salmo salar</i> |
| CIIIb             | HPRΔ        | 2007        | T129/07     | JN711077         | SW | Farmed, <i>Salmo salar</i> |
| CIIIb             | HPRΔ        | 2007        | T130/07     | MK125501         | SW | Farmed, <i>Salmo salar</i> |
| CIV               | HPRΔ        | 2007        | T131/07     | JN711078         | SW | Farmed, <i>Salmo salar</i> |
| CIV               | HPRΔ        | 2007        | T132/07     | MK125502         | SW | Farmed, <i>Salmo salar</i> |
| CIV               | HPRΔ        | 2007        | T136/07     | MK125503         | SW | Farmed, <i>Salmo salar</i> |
| CIIa              | HPRΔ        | 2007        | T-ISA2/07-1 | FN687286         | SW | Farmed, <i>Salmo salar</i> |
| CIIa              | HPRΔ        | 2007        | T-ISA2/07-2 | FN687287         | SW | Farmed, <i>Salmo salar</i> |
| CIIIb             | HPRΔ        | 2007        | T-ISA3/07-1 | FN687288         | SW | Farmed, <i>Salmo salar</i> |
| CIIIb             | HPRΔ        | 2007        | T-ISA3/07-2 | FN687289         | SW | Farmed, <i>Salmo salar</i> |
| CIV               | HPRΔ        | 2007        | T-ISA4/07-1 | FN687290         | SW | Farmed, <i>Salmo salar</i> |
| CIV               | HPRΔ        | 2007        | T-ISA4/07-2 | FN687291         | SW | Farmed, <i>Salmo salar</i> |
| CIIIb, NI in Fig. | HPRΔ        | 2007        | ISA5/07-1   | FN687292         | SW | Farmed, <i>Salmo salar</i> |
| CIIIb             | HPRΔ        | 2007        | T-ISA5/07-2 | FN687293         | SW | Farmed, <i>Salmo salar</i> |

|                   |      |      |              |          |    |                            |
|-------------------|------|------|--------------|----------|----|----------------------------|
| CIIIb             | HPRΔ | 2007 | T-ISA6/07-1  | FN687294 | SW | Farmed, <i>Salmo salar</i> |
| CIIIb, NI in Fig. | HPRΔ | 2007 | T-ISA6/07-2  | FN687295 | SW | Farmed, <i>Salmo salar</i> |
| CIIIb, NI in Fig. | HPRΔ | 2007 | T-ISA6/07-3  | FN687296 | SW | Farmed, <i>Salmo salar</i> |
| CIIIb, NI in Fig. | HPRΔ | 2007 | T-ISA6/07-4  | FN687297 | SW | Farmed, <i>Salmo salar</i> |
| CIIIb, NI in Fig. | HPRΔ | 2007 | T-ISA6/07-5  | FN687298 | SW | Farmed, <i>Salmo salar</i> |
| CIIIb, NI in Fig. | HPRΔ | 2007 | T-ISA6/07-6  | FN687299 | SW | Farmed, <i>Salmo salar</i> |
| CIIIb, NI in Fig. | HPRΔ | 2007 | T-ISA6/07-7  | FN687300 | SW | Farmed, <i>Salmo salar</i> |
| CIIIb, NI in Fig. | HPRΔ | 2007 | T-ISA6/07-8  | FN687301 | SW | Farmed, <i>Salmo salar</i> |
| CIIIb, NI in Fig. | HPRΔ | 2007 | T-ISA6/07-9  | FN687302 | SW | Farmed, <i>Salmo salar</i> |
| CIV               | HPRΔ | 2007 | T-ISA7/07-1  | FN687303 | SW | Farmed, <i>Salmo salar</i> |
| CIV               | HPRΔ | 2007 | T-ISA7/07-2  | FN687304 | SW | Farmed, <i>Salmo salar</i> |
| CIIIb             | HPRΔ | 2008 | T140/08      | JN711079 | SW | Farmed, <i>Salmo salar</i> |
| CIIIb             | HPRΔ | 2008 | T144/08      | JN711080 | SW | Farmed, <i>Salmo salar</i> |
| CIIIb             | HPRΔ | 2008 | T145/08      | JN711081 | SW | Farmed, <i>Salmo salar</i> |
| CIIIb             | HPRΔ | 2008 | T147/08      | JN711082 | SW | Farmed, <i>Salmo salar</i> |
| CIIIb             | HPRΔ | 2008 | T148/08      | JN711083 | SW | Farmed, <i>Salmo salar</i> |
| CIIIb             | HPRΔ | 2008 | T149/08      | JN711084 | SW | Farmed, <i>Salmo salar</i> |
| CIIIb             | HPRΔ | 2008 | T151/08      | JN711085 | SW | Farmed, <i>Salmo salar</i> |
| CIIIb, NI in Fig. | HPRΔ | 2008 | T-ISA2/08-1  | FN687306 | SW | Farmed, <i>Salmo salar</i> |
| CIIIb             | HPRΔ | 2008 | T-ISA2/08-2  | FN687307 | SW | Farmed, <i>Salmo salar</i> |
| CIIIb             | HPR0 | 2008 | T-AR2/08     | FN687348 | SW | Farmed, <i>Salmo salar</i> |
| CIIIb             | HPR0 | 2008 | T-AR5/08     | FN687350 |    | Farmed, <i>Salmo salar</i> |
| CII               | HPR0 | 2008 | T-AR4/08     | HE800144 | FW | Farmed, <i>Salmo salar</i> |
| CIIIb             | HPR0 | 2008 | T-AR7/08     | FN687351 |    | Farmed, <i>Salmo salar</i> |
| CIIIb             | HPR0 | 2008 | T-AR8/08     | FN687352 |    | Farmed, <i>Salmo salar</i> |
| CII               | HPR0 | 2008 | T-AR9/08     | FN687353 |    | Farmed, <i>Salmo salar</i> |
| CIIIb             | HPRΔ | 2008 | T-ISA6/08-1  | FN687314 | SW | Farmed, <i>Salmo salar</i> |
| CIIIb             | HPRΔ | 2008 | T-ISA6/08-2  | FN687315 | SW | Farmed, <i>Salmo salar</i> |
| CIIIb, NI in Fig. | HPRΔ | 2008 | T-ISA10/08-1 | FN687321 | SW | Farmed, <i>Salmo salar</i> |
| CIIIb, NI in Fig. | HPRΔ | 2008 | T-ISA10/08-2 | FN687322 | SW | Farmed, <i>Salmo salar</i> |
| CIIIb             | HPRΔ | 2008 | T-ISA11/08-1 | FN687323 | SW | Farmed, <i>Salmo salar</i> |
| CIIIb             | HPRΔ | 2008 | T-ISA11/08-2 | FN687324 | SW | Farmed, <i>Salmo salar</i> |
| CIIIb, NI in Fig. | HPRΔ | 2008 | T-ISA12/08-1 | FN687325 | SW | Farmed, <i>Salmo salar</i> |
| CIIIb, NI in Fig. | HPRΔ | 2008 | T-ISA12/08-2 | FN687326 | SW | Farmed, <i>Salmo salar</i> |
| CIIIb, NI in Fig. | HPRΔ | 2008 | T-ISA13/08-1 | FN687327 | SW | Farmed, <i>Salmo salar</i> |
| CIIIb, NI in Fig. | HPRΔ | 2008 | T-ISA13/08-1 | FN687328 | SW | Farmed, <i>Salmo salar</i> |
| CIIIb             | HPRΔ | 2008 | T-ISA14/08-1 | FN687329 | SW | Farmed, <i>Salmo salar</i> |
| CIIIb, NI in Fig. | HPRΔ | 2008 | T-ISA14/08-2 | FN687330 | SW | Farmed, <i>Salmo salar</i> |
| CIIIb             | HPRΔ | 2008 | T-ISA15/08-1 | FN687331 | SW | Farmed, <i>Salmo salar</i> |
| CIIIb             | HPRΔ | 2008 | T-ISA15/08-2 | FN687332 | SW | Farmed, <i>Salmo salar</i> |
| CIVa              | HPRΔ | 2008 | T-ISA16/08   | FN687333 | SW | Farmed, <i>Salmo salar</i> |
| CIIIb             | HPRΔ | 2009 | T152/09      | JN711086 | SW | Farmed, <i>Salmo salar</i> |
| CIIIb             | HPRΔ | 2009 | T154/09      | JN711087 | SW | Farmed, <i>Salmo salar</i> |
| CIIIb             | HPRΔ | 2009 | T158/09      | JN711088 | SW | Farmed, <i>Salmo salar</i> |
| CIIIb             | HPRΔ | 2009 | T160/09      | JN711089 | SW | Farmed, <i>Salmo salar</i> |
| CIIIb             | HPRΔ | 2009 | T161/09      | JN711090 | SW | Farmed, <i>Salmo salar</i> |
| CIV               | HPR0 | 2009 | T162/09      | JN711091 | FW | Farmed, <i>Salmo salar</i> |
| CIIIb, NI in Fig. | HPRΔ | 2009 | T-ISA1/09-1  | FN687334 | SW | Farmed, <i>Salmo salar</i> |
| CIIIb             | HPRΔ | 2009 | T-ISA1/09-2  | FN687335 | SW | Farmed, <i>Salmo salar</i> |

|                   |            |             |             |                  |    |                            |
|-------------------|------------|-------------|-------------|------------------|----|----------------------------|
| CIIIb, NI in Fig. | HPRΔ       | 2009        | T-ISA2/09-1 | FN687336         | SW | Farmed, <i>Salmo salar</i> |
| CIIIb, NI in Fig. | HPRΔ       | 2009        | T-ISA2/09-2 | FN687337         | SW | Farmed, <i>Salmo salar</i> |
| CIIIb, NI in Fig. | HPRΔ       | 2009        | T-ISA3/09-1 | FN687338         | SW | Farmed, <i>Salmo salar</i> |
| CIIIb, NI in Fig. | HPRΔ       | 2009        | T-ISA3/09-2 | FN687339         | SW | Farmed, <i>Salmo salar</i> |
| CIIIb             | HPRΔ       | 2009        | T-ISA5/09-1 | FN687342         | SW | Farmed, <i>Salmo salar</i> |
| CIIIb, NI in Fig. | HPRΔ       | 2009        | T-ISA5/09-2 | FN687343         | SW | Farmed, <i>Salmo salar</i> |
| CIIIb             | HPRΔ       | 2009        | T-ISA6/09-1 | FN687344         | SW | Farmed, <i>Salmo salar</i> |
| CIIIb, NI in Fig. | HPRΔ       | 2009        | T-ISA6/09-2 | FN687345         | SW | Farmed, <i>Salmo salar</i> |
| CIIIb, NI in Fig. | HPRΔ       | 2009        | T-ISA7/09-1 | FN687346         | SW | Farmed, <i>Salmo salar</i> |
| CIIIb             | HPRΔ       | 2009        | T-ISA7/09-2 | FN687347         | SW | Farmed, <i>Salmo salar</i> |
| CIIIb             | HPRΔ       | 2010        | T167/10     | JN711092         | SW | Farmed, <i>Salmo salar</i> |
| CIIIb             | HPR0       | 2012        | T176/12     | MH397942         | SW | Farmed, <i>Salmo salar</i> |
| CIIIa             | HPRΔ       | 2013        | T181/13     | MH397943         | SW | Farmed, <i>Salmo salar</i> |
| CIIIc             | HPR0       | 2013        | T211a/13    | MH397945         | FW | Farmed, <i>Salmo salar</i> |
| CIIIc             | HPR0       | 2013        | T211b/13    | MH397946         | FW | Farmed, <i>Salmo salar</i> |
| CIIIc             | HPRΔ       | 2014        | T191/14     | MH397944         | SW | Farmed, <i>Salmo salar</i> |
| <b>Finnmark</b>   | <b>HPR</b> | <b>Year</b> | <b>Code</b> | <b>Accession</b> |    | <b>Host</b>                |
| CIVe              | HPRΔ       | 2004        | FM86/04     | AY971659         | SW | Farmed, <i>Salmo salar</i> |
| CIIa              | HPRΔ       | 2004        | FM98/04     | AY971660         | SW | Farmed, <i>Salmo salar</i> |
| CIV               | HPRΔ       | 2004        | FM100/04    | AY971658         | SW | Farmed, <i>Salmo salar</i> |
| CIVe              | HPRΔ       | 2004        | FM2004/04B  | FM203250         | SW | Farmed, <i>Salmo salar</i> |
| CIV               | HPRΔ       | 2004        | FM2004/14A  | FM203268         | SW | Farmed, <i>Salmo salar</i> |
| CIV               | HPRΔ       | 2004        | FM2004/14B  | FM203269         | SW | Farmed, <i>Salmo salar</i> |
| CIIa              | HPRΔ       | 2005        | FM106/05    | DQ108599         | SW | Farmed, <i>Salmo salar</i> |
| CIIa              | HPRΔ       | 2005        | FM107/05    | DQ108600         | SW | Farmed, <i>Salmo salar</i> |
| CIIa              | HPRΔ       | 2005        | FM108/05    | DQ108601         | SW | Farmed, <i>Salmo salar</i> |
| CII               | HPRΔ       | 2005        | FM114/05    | JN711057         | SW | Farmed, <i>Salmo salar</i> |
| CIVe              | HPRΔ       | 2005        | FM2005/10A  | FM203288         | SW | Farmed, <i>Salmo salar</i> |
| CIVe              | HPRΔ       | 2005        | FM2005/10B  | FM203289         | SW | Farmed, <i>Salmo salar</i> |
| CII               | HPRΔ       | 2006        | FM116/06    | JN711058         | SW | Farmed, <i>Salmo salar</i> |
| CII               | HPRΔ       | 2006        | FM117/06    | MH397878         | SW | Farmed, <i>Salmo salar</i> |
| CII               | HPRΔ       | 2006        | FM119/06    | MH397879         | SW | Farmed, <i>Salmo salar</i> |
| CIVa              | HPRΔ       | 2010        | FM168/10    | JN711059         | SW | Farmed, <i>Salmo salar</i> |
| CII               | HPR0       | 2011        | FM173/11    | JN711060         | SW | Farmed, <i>Salmo salar</i> |
| CIVa              | HPRΔ       | 2011        | FM174a/11   | JN711061         | SW | Farmed, <i>Salmo salar</i> |
| CIVa              | HPRΔ       | 2011        | FM174b/11   | JN711062         | SW | Farmed, <i>Salmo salar</i> |
| CIIId             | HPR0       | 2011        | FM174c/11   | MH397880         | SW | Farmed, <i>Salmo salar</i> |
| CIVa              | HPRΔ       | 2011        | FM174d/11   | MH397881         | SW | Farmed, <i>Salmo salar</i> |
| CII               | HPR0       | 2011        | FM174e/11   | MH397882         | SW | Farmed, <i>Salmo salar</i> |
| CII               | HPRΔ       | 2011        | FM174f/11   | MH397883         | SW | Farmed, <i>Salmo salar</i> |
| CIVa              | HPRΔ       | 2011        | FM174g/11   | MH397884         | SW | Farmed, <i>Salmo salar</i> |
| CIVa              | HPRΔ       | 2011        | FM174i/11   | MH397885         | SW | Farmed, <i>Salmo salar</i> |
| CII               | HPRΔ       | 2011        | FM174j/11   | MH397886         | SW | Farmed, <i>Salmo salar</i> |
| CIVa              | HPRΔ       | 2011        | FM174k/11   | MH397887         | SW | Farmed, <i>Salmo salar</i> |
| CII               | HPR0       | 2011        | FM174m/11   | MH397888         | SW | Farmed, <i>Salmo salar</i> |
| CII               | HPRΔ       | 2011        | FM174n/11   | MH397889         | SW | Farmed, <i>Salmo salar</i> |
| CII               | HPR0       | 2016        | FM200a/16   | MH286476         | FW | Wild, <i>Salmo salar</i>   |
| CII               | HPR0       | 2016        | FM200b/16   | MH286477         | FW | Wild, <i>Salmo salar</i>   |
| CII               | HPR0       | 2016        | FM201/16    | MH286478         | FW | Wild, <i>Salmo salar</i>   |

|                       |            |             |             |                  |    |                            |
|-----------------------|------------|-------------|-------------|------------------|----|----------------------------|
| CII                   | HPR0       | 2016        | FM202/16    | MH286479         | FW | Wild, <i>Salmo salar</i>   |
| CIIIa                 | HPRΔ       | 2016        | FM208a/16   | MH397890         | SW | Farmed, <i>Salmo salar</i> |
| CIIIa                 | HPRΔ       | 2016        | FM208b/16   | MH397891         | SW | Farmed, <i>Salmo salar</i> |
| CIIIa                 | HPRΔ       | 2016        | FM208c/16   | MH397892         | SW | Farmed, <i>Salmo salar</i> |
| CIIIa                 | HPRΔ       | 2016        | FM208d/16   | MH397893         | SW | Farmed, <i>Salmo salar</i> |
| CIVb                  | HPR0       | 2016        | FM212/16    | MH397894         | FW | Farmed, <i>Salmo salar</i> |
| CIVb                  | HPR0       | 2016        | FM213/16    | MH397895         | FW | Farmed, <i>Salmo salar</i> |
| CIVb                  | HPR0       | 2016        | FM214/16    | MH397896         | FW | Farmed, <i>Salmo salar</i> |
| CIVb                  | HPR0       | 2016        | FM215/16    | MH397897         | FW | Farmed, <i>Salmo salar</i> |
| CII                   | HPR0       | 2017        | FM237/17    | MH286480         | FW | Wild, <i>Salmo salar</i>   |
| CII                   | HPR0       | 2017        | FM240/17    | MH286481         | SW | Wild, <i>Salmo salar</i>   |
| <b>Unknown-Norway</b> | <b>HPR</b> | <b>Year</b> | <b>Code</b> | <b>Accession</b> |    | <b>Host</b>                |
| CIV                   | HPRΔ       | 1999        | 810/9/99    | AF378180         | SW | Farmed, <i>Salmo salar</i> |
| CIVb                  | HPR0       | 2006        | SK779/06    | EU118820         | SW | Farmed, <i>Salmo salar</i> |
| CII                   | HPRΔ       | 2006        | 2006/01A    | FR751546         | SW | Farmed, <i>Salmo salar</i> |
| CII                   | HPRΔ       | 2006        | 2006/01B    | FR751547         | SW | Farmed, <i>Salmo salar</i> |
| CIVe                  | HPRΔ       | 2006        | 2006/03A    | FR751550         | SW | Farmed, <i>Salmo salar</i> |
| CIVe                  | HPRΔ       | 2006        | 2006/03B    | FR751551         | SW | Farmed, <i>Salmo salar</i> |
| CIVe                  | HPR0       | 2006        | SC1/06      | HE800145         |    | Farmed, <i>Salmo salar</i> |
| CIV                   | HPR0       | 2006        | SC2/06      | HE800146         |    | Farmed, <i>Salmo salar</i> |
| CIII                  | HPR0       | 2008        | AR2/08      | FN687348         | SW | Farmed, <i>Salmo salar</i> |
| CIIIb, NI in Fig.     | HPR0       | 2008        | AR3/08      | FN687349         | SW | Farmed, <i>Salmo salar</i> |
| CIVb                  | HPR0       | 2008        | SC1/08A     | HE800147         |    | Farmed, <i>Salmo salar</i> |
| CIVb                  | HPR0       | 2008        | SC1/08B     | HE800148         |    | Farmed, <i>Salmo salar</i> |
| CIV                   | HPRΔ       | 2009        | ISA8-09-1   | FR796471         | SW | Farmed, <i>Salmo salar</i> |
| CIV                   | HPRΔ       | 2009        | ISA8-09-2   | FR796472         | SW | Farmed, <i>Salmo salar</i> |
| CIV                   | HPR0       | 2009        | SC1/09      | HE800149         |    | Farmed, <i>Salmo salar</i> |
| CIIIc                 | HPR0       | 2009        | SC2/09B     | HE800150         |    | Farmed, <i>Salmo salar</i> |
| CIIIc                 | HPR0       | 2009        | SC2/09C     | HE800151         |    | Farmed, <i>Salmo salar</i> |
| CIV                   | HPR0       | 2009        | SC3/09A     | HE800152         |    | Farmed, <i>Salmo salar</i> |
| CIVa                  | HPRΔ       | 2009        | ISA9/09A    | HE800174         | SW | Farmed, <i>Salmo salar</i> |
| CIIIa                 | HPR0       | 2010        | SC1/10      | HE800154         |    | Farmed, <i>Salmo salar</i> |
| CIIIa                 | HPR0       | 2010        | SC2/10A     | HE800155         |    | Farmed, <i>Salmo salar</i> |
| CIIIa                 | HPR0       | 2010        | SC2/10B     | HE800156         |    | Farmed, <i>Salmo salar</i> |
| CIV                   | HPR0       | 2010        | SC4/10      | HE800157         |    | Farmed, <i>Salmo salar</i> |
| CIVb                  | HPR0       | 2010        | SC5/10      | HE800158         |    | Farmed, <i>Salmo salar</i> |
| CIVb                  | HPR0       | 2010        | SC6/10      | HE800159         |    | Farmed, <i>Salmo salar</i> |
| CIV                   | HPR0       | 2010        | SC7/10      | HE800160         |    | Farmed, <i>Salmo salar</i> |
| CIV                   | HPR0       | 2010        | SC9/10A     | HE800161         |    | Farmed, <i>Salmo salar</i> |
| CIIIa                 | HPR0       | 2010        | SC10/10A    | HE800162         |    | Farmed, <i>Salmo salar</i> |
| CIV                   | HPR0       | 2010        | SC11/10     | HE800163         |    | Farmed, <i>Salmo salar</i> |
| CIV                   | HPR0       | 2010        | SC12/10A    | HE800164         |    | Farmed, <i>Salmo salar</i> |
| CIV                   | HPR0       | 2010        | SC12/10B    | HE800165         |    | Farmed, <i>Salmo salar</i> |
| CIIIa                 | HPR0       | 2010        | SC13/10     | HE800166         |    | Farmed, <i>Salmo salar</i> |
| CIVa                  | HPR0       | 2010        | SC14/10A    | HE800167         |    | Farmed, <i>Salmo salar</i> |
| CIIIa                 | HPR0       | 2010        | SC15/10     | HE800169         |    | Farmed, <i>Salmo salar</i> |
| CIIIa, NI in Fig.     | HPR0       | 2010        | SC16/10A    | HE800170         |    | Farmed, <i>Salmo salar</i> |
| CIIIa                 | HPR0       | 2010        | SC16/10B    | HE800171         |    | Farmed, <i>Salmo salar</i> |
| CIIIa                 | HPR0       | 2010        | SC16/10C    | HE800172         |    | Farmed, <i>Salmo salar</i> |



|                       |            |             |               |                  |    |                                |
|-----------------------|------------|-------------|---------------|------------------|----|--------------------------------|
| CIVa                  | HPRΔ       | 2010        | ISA4/10A      | HE800176         | SW | Farmed, <i>Salmo salar</i>     |
| CIIIc                 | HPRΔ       | 2010        | ISA5/10A      | HE800178         | SW | Farmed, <i>Salmo salar</i>     |
| CIIIc                 | HPRΔ       | 2010        | ISA5/10B      | HE800179         | SW | Farmed, <i>Salmo salar</i>     |
| CIIla                 | HPRΔ       | 2010        | ISA6/10A      | HE800180         | SW | Farmed, <i>Salmo salar</i>     |
| <b>Scotland</b>       | <b>HPR</b> | <b>Year</b> | <b>Code</b>   | <b>Accession</b> |    | <b>Host</b>                    |
| CIV                   | HPRΔ       | 1998        | Scot301/98    | AF388581         | SW | Farmed, <i>Salmo salar</i>     |
| CIV                   | HPRΔ       | 1998        | Scot43/98     | AF302802         | SW | Farmed, <i>Salmo salar</i>     |
| CIV                   | HPRΔ       | 1998        | Scot832/98    | AF388582         | SW | Farmed, <i>Salmo salar</i>     |
| CI                    | HPR0       | 2007        | NWM10         | FJ178189         | SW | Farmed, <i>Salmo salar</i>     |
| CIVd                  | HPR0       | 2008        | Scot157/08    | JN711096         | FW | Brood fish, <i>Salmo salar</i> |
| <b>Faeroe Islands</b> | <b>HPR</b> | <b>Year</b> | <b>Code</b>   | <b>Accession</b> |    | <b>Host</b>                    |
| CIIc                  | HPRΔ       | 2002        | F72/02        | AF526263         | SW | Farmed, <i>Salmo salar</i>     |
| CIIc                  | HPRΔ       | 2002        | F72b/02       | AY971656         | SW | Farmed, <i>Salmo salar</i>     |
| CIIc                  | HPRΔ       | 2002        | F72d/02       | AY971657         | SW | Farmed, <i>Salmo salar</i>     |
| CIIc                  | HPRΔ       | 2002        | F72e/02       | DQ108612         | SW | Farmed, <i>Salmo salar</i>     |
| CII                   | HPRΔ       | 2001        | FO/03/01      | HQ664991         | SW | Farmed, <i>Salmo salar</i>     |
| CIIId                 | HPR0       | 2006        | FO/01/06      | HQ664992         | SW | Farmed, <i>Salmo salar</i>     |
| CI                    | HPR0       | 2006        | FO/03/06      | HQ664993         | SW | Farmed, <i>Salmo salar</i>     |
| CIIc                  | HPR0       | 2007        | FO/01b/07     | HQ664995         | SW | Farmed, <i>Salmo salar</i>     |
| CIIc                  | HPR0       | 2007        | FO/03a/07     | HQ664996         | SW | Farmed, <i>Salmo salar</i>     |
| CI                    | HPR0       | 2007        | FO/03b/07     | HQ664997         | SW | Farmed, <i>Salmo salar</i>     |
| CIIId                 | HPR0       | 2007        | FO/01a/07     | HQ664994         | SW | Farmed, <i>Salmo salar</i>     |
| CI                    | HPR0       | 2007        | FO/08/07      | HQ664998         | SW | Farmed, <i>Salmo salar</i>     |
| CII                   | HPR0       | 2008        | FO/01/08      | HQ664999         | SW | Farmed, <i>Salmo salar</i>     |
| CI                    | HPR0       | 2012        | FO/07/12      | KX823921         | FW | Farmed, <i>Salmo salar</i>     |
| CI                    | HPR0       | 2011        | FO/452/11     | KX823927         | FW | Farmed, <i>Salmo salar</i>     |
| CI                    | HPR0       | 2011        | FO/455/11     | KX823928         | FW | Farmed, <i>Salmo salar</i>     |
| CI                    | HPR0       | 2012        | FO/570/12     | KX823929         | FW | Farmed, <i>Salmo salar</i>     |
| CI, NI in Fig.        | HPRΔ       | 2014        | FO/121/14     | KX823922         | SW | Farmed, <i>Salmo salar</i>     |
| CI                    | HPR0       | 2014        | FO/95a/14     | KX823930         | SW | Farmed, <i>Salmo salar</i>     |
| CIIc                  | HPR0       | 2014        | FO/95b/14     | KX823931         | SW | Farmed, <i>Salmo salar</i>     |
| CI                    | HPR0       | 2014        | FO/143/14     | KX823932         | SW | Farmed, <i>Salmo salar</i>     |
| CI                    | HPR0       | 2014        | FO/144/14     | KX823933         | SW | Farmed, <i>Salmo salar</i>     |
| CI                    | HPR0       | 2014        | FO/151/14     | KX823934         | SW | Farmed, <i>Salmo salar</i>     |
| CI                    | HPR0       | 2014        | FO/178/14     | KX823935         | SW | Farmed, <i>Salmo salar</i>     |
| <b>Russia</b>         | <b>HPR</b> | <b>Year</b> | <b>Code</b>   | <b>Accession</b> |    | <b>Host</b>                    |
| CIIla                 | HPRΔ       | 2017        | RU243/17      | MH397916         | SW | Farmed, <i>Salmo salar</i>     |
| CIIla                 | HPRΔ       | 2017        | RU244/17      | MH397917         | SW | Farmed, <i>Salmo salar</i>     |
| <b>USA</b>            | <b>HPR</b> | <b>Year</b> | <b>Code</b>   | <b>Accession</b> |    | <b>Host</b>                    |
| CI                    | HPR0       | 2004        | USA2004       | AY973194         | SW | Farmed, <i>Salmo salar</i>     |
| <b>Chile</b>          |            |             |               |                  |    |                                |
| CIVa                  | HPRΔ       | 2007        | Ch-NO/1720/07 | AM941715         | SW | Farmed, <i>Salmo salar</i>     |
| CIVa, NI in fig.      | HPRΔ       | 2007        | Ch26955-3     | EU625679         | SW | Farmed, <i>Salmo salar</i>     |
| CIVa                  | HPRΔ       | 2008        | Ch01/08       | EU851043         | SW | Farmed, <i>Salmo salar</i>     |
| CIVa                  | HPRΔ       | 2008        | Ch05/08       | JN711093         | SW | Farmed, <i>Salmo salar</i>     |
| CIVa                  | HPR0       | 2008        | CH29/08       | JN711094         | FW | Farmed, <i>Salmo salar</i>     |
| CIVa                  | HPR0       | 2008        | CH30/08       | JN711095         | FW | Farmed, <i>Salmo salar</i>     |
| CIVa                  | HPRΔ       | 2008        | Ch-PM4165     | FJ594295         | SW | Farmed, <i>Salmo salar</i>     |
| CIVa                  | HPRΔ       | 2008        | Ch13364/06B   | FJ594284         | SW | Farmed, <i>Salmo salar</i>     |

|                  |      |      |           |          |    |                            |
|------------------|------|------|-----------|----------|----|----------------------------|
| CIVa             | HPR0 |      | Ch-75     | JQ712975 |    | Farmed, <i>Salmo salar</i> |
| CIVa             | HPRΔ | 2009 | Ch-752    | GU830900 | SW | Farmed, <i>Salmo salar</i> |
| CIVa             | HPRΔ | 2009 | Ch-901    | GU830908 | SW | Farmed, <i>Salmo salar</i> |
| CIVa, NI in fig. | HPRΔ | 2010 | GIM-13968 | MF314009 |    | Farmed, <i>Salmo salar</i> |
| CIVa, NI in fig. | HPRΔ | 2010 | GIM-13552 | MF314012 |    | Farmed, <i>Salmo salar</i> |
| CIVa, NI in fig. | HPRΔ | 2010 | GIM-13970 | MF314013 |    | Farmed, <i>Salmo salar</i> |
| CIVa, NI in fig. | HPR0 | 2011 | GIM-14046 | MF314014 |    | Farmed, <i>Salmo salar</i> |
| CIVa, NI in fig. | HPRΔ | 2011 | GIM-14332 | MF314015 |    | Farmed, <i>Salmo salar</i> |
| CIVa, NI in fig. | HPR0 | 2011 | GIM-14542 | MF314016 |    | Farmed, <i>Salmo salar</i> |
| CIVd             | HPR0 | 2012 | Ch-ID758  | KF019742 |    | Farmed, <i>Salmo salar</i> |
| CIVd             | HPRΔ | 2013 | Ch15-1    | KF051855 | SW | Farmed, <i>Salmo salar</i> |
| CIVd, NI in fig. | HPRΔ | 2013 | Ch15-2    | KF051856 |    | Farmed, <i>Salmo salar</i> |
| CIVd             | HPRΔ | 2013 | Ch15-3    | KF051857 | SW | Farmed, <i>Salmo salar</i> |
| CIVd, NI in fig. | HPRΔ | 2013 | Ch15-4    | KF051858 |    | Farmed, <i>Salmo salar</i> |
| CIVd, NI in fig. | HPRΔ | 2013 | Ch15-5    | KF051859 | SW | Farmed, <i>Salmo salar</i> |
| CIVd             | HPR0 | 2013 | Ch1390-12 | KF373253 |    | Farmed, <i>Salmo salar</i> |
| CIVd             | HPR0 | 2013 | Ch1420-3  | KF373255 |    | Farmed, <i>Salmo salar</i> |
| CIVd, NI in fig. | HPRΔ | 2013 | Ch15-6    | KF051860 | SW | Farmed, <i>Salmo salar</i> |
| CIVd, NI in fig. | HPRΔ | 2013 | Ch15-7    | KF051861 |    | Farmed, <i>Salmo salar</i> |
| CIVd, NI in fig. | HPRΔ | 2013 | Ch15-8    | KF051862 | SW | Farmed, <i>Salmo salar</i> |
| CIVd, NI in fig. | HPRΔ | 2013 | Ch15-9    | KF051863 | SW | Farmed, <i>Salmo salar</i> |
| CIVd, NI in fig. | HPRΔ | 2013 | Ch15-10   | KF051864 | SW | Farmed, <i>Salmo salar</i> |
| CIVd, NI in fig. | HPRΔ | 2013 | Ch15-11   | KF051865 | SW | Farmed, <i>Salmo salar</i> |
| CIVd, NI in fig. | HPRΔ | 2013 | Ch15-12   | KF051866 | SW | Farmed, <i>Salmo salar</i> |
| CIVd, NI in fig. | HPRΔ | 2013 | Ch15-13   | KF051867 |    | Farmed, <i>Salmo salar</i> |
| CIVd, NI in fig. | HPRΔ | 2013 | Ch15-14   | KF051868 | SW | Farmed, <i>Salmo salar</i> |
| CIVd, NI in fig. | HPRΔ | 2013 | Ch15-15   | KF051869 | SW | Farmed, <i>Salmo salar</i> |
| CIVd             | HPRΔ | 2013 | Ch15-16   | KF051870 | SW | Farmed, <i>Salmo salar</i> |
| CIVd             | HPRΔ | 2013 | Ch26-5    | KF051871 | SW | Farmed, <i>Salmo salar</i> |
| CIVa             | HPRΔ | 2013 | Ch26-6    | KF051872 | SW | Farmed, <i>Salmo salar</i> |
| CIVd             | HPRΔ | 2013 | Ch26-8    | KF051873 | SW | Farmed, <i>Salmo salar</i> |
| CIVa             | HPRΔ | 2013 | Ch71-4    | KF051874 | SW | Farmed, <i>Salmo salar</i> |
| CIVa             | HPRΔ | 2013 | Ch71-5    | KF051875 |    | Farmed, <i>Salmo salar</i> |
| CIVa             | HPRΔ | 2013 | Ch71-7    | KF051876 | SW | Farmed, <i>Salmo salar</i> |
| CIVa, NI in fig. | HPRΔ | 2013 | Ch71-8    | KF051877 |    | Farmed, <i>Salmo salar</i> |
| CIVa, NI in fig. | HPRΔ | 2013 | Ch71-9    | KF051878 |    | Farmed, <i>Salmo salar</i> |
| CIVd, NI in fig. | HPRΔ | 2013 | Ch77-16   | KF051879 |    | Farmed, <i>Salmo salar</i> |
| CIVd, NI in fig. | HPRΔ | 2013 | Ch77-17   | KF051880 |    | Farmed, <i>Salmo salar</i> |
| CIVd, NI in fig. | HPRΔ | 2013 | Ch77-18   | KF051881 | SW | Farmed, <i>Salmo salar</i> |
| CIVd, NI in fig. | HPRΔ | 2013 | Ch78-1    | KF051882 | SW | Farmed, <i>Salmo salar</i> |
| CIVd, NI in fig. | HPRΔ | 2013 | Ch78-2    | KF051883 |    | Farmed, <i>Salmo salar</i> |
| CIVd, NI in fig. | HPRΔ | 2013 | Ch78-3    | KF051884 | SW | Farmed, <i>Salmo salar</i> |
| CIVd, NI in fig. | HPRΔ | 2013 | Ch78-5    | KF051885 |    | Farmed, <i>Salmo salar</i> |
| CIVd, NI in fig. | HPRΔ | 2013 | Ch78-6    | KF051886 |    | Farmed, <i>Salmo salar</i> |
| CIVd, NI in fig. | HPRΔ | 2013 | CH78-7    | KF051887 |    | Farmed, <i>Salmo salar</i> |
| CIVd, NI in fig. | HPRΔ | 2013 | Ch78-8    | KF051888 | SW | Farmed, <i>Salmo salar</i> |
| CIVd, NI in fig. | HPRΔ | 2013 | Ch78-10   | KF051889 | SW | Farmed, <i>Salmo salar</i> |
| CIVd, NI in fig. | HPRΔ | 2013 | Ch78-11   | KF051890 |    | Farmed, <i>Salmo salar</i> |
| CIVd, NI in fig. | HPRΔ | 2013 | Ch78-12   | KF051891 |    | Farmed, <i>Salmo salar</i> |

Formatted: Centered

Formatted: Centered

|                  |      |      |           |          |    |                            |
|------------------|------|------|-----------|----------|----|----------------------------|
| CIVd, NI in fig. | HPRΔ | 2013 | Ch78-14   | KF051892 |    | Farmed, <i>Salmo salar</i> |
| CIVd, NI in fig. | HPRΔ | 2013 | Ch78-15   | KF051893 |    | Farmed, <i>Salmo salar</i> |
| CIVd, NI in fig. | HPRΔ | 2013 | Ch78-16   | KF051894 | SW | Farmed, <i>Salmo salar</i> |
| CIVd, NI in fig. | HPRΔ | 2013 | Ch78-17   | KF051895 |    | Farmed, <i>Salmo salar</i> |
| CIVd, NI in fig. | HPRΔ | 2013 | Ch87-25   | KF051896 |    | Farmed, <i>Salmo salar</i> |
| CIVd, NI in fig. | HPRΔ | 2013 | Ch87-27   | KF051897 |    | Farmed, <i>Salmo salar</i> |
| CIVd, NI in fig. | HPRΔ | 2013 | Ch87-28   | KF051898 | SW | Farmed, <i>Salmo salar</i> |
| CIVd, NI in fig. | HPRΔ | 2013 | Ch87-30   | KF051899 | SW | Farmed, <i>Salmo salar</i> |
| CIVd, NI in fig. | HPRΔ | 2013 | Ch87-33   | KF051900 |    | Farmed, <i>Salmo salar</i> |
| CIVa, NI in fig. | HPRΔ | 2013 | GIM-HPR3a | MF314005 |    | Farmed, <i>Salmo salar</i> |
| CIVd             | HPRΔ | 2013 | Ch3201-5  | KF373259 | SW | Farmed, <i>Salmo salar</i> |
| CIVd             | HPRΔ | 2013 | Ch3663-1  | KF373260 | SW | Farmed, <i>Salmo salar</i> |
| CIVd, NI in fig. | HPRΔ | 2013 | Ch3663-2  | KF373261 | SW | Farmed, <i>Salmo salar</i> |
| CIVd             | HPRΔ | 2013 | Ch3016-3  | KF386112 | SW | Farmed, <i>Salmo salar</i> |
| CIVd             | HPR0 | 2013 | Ch1673-5  | KF413751 |    | Farmed, <i>Salmo salar</i> |
| CIVa, NI in fig. | HPR0 | 2015 | GIM-19336 | MF314010 |    | Farmed, <i>Salmo salar</i> |
| CIVa, NI in fig. | HPRΔ | 2015 | GIM-19356 | MF314036 |    | Farmed, <i>Salmo salar</i> |
